# Supplementary material
Source: publisher figshare collection journal article supplement (https://springernature.figshare.com/ndownloader/files/16538984)
Supplement: Supplementary file 1 [file 16538984]

# Aspen Chromatography Model

The mass balance equation used in the Aspen Chromatography simulations is as follows:

$$\varepsilon_b \frac{\partial C_i}{\partial t} + K_{se}(1 - \varepsilon_b)\varepsilon_p \frac{\partial \bar{C}_{i,pore}}{\partial t} + (1 - \varepsilon_b)(1 - \varepsilon_p)\rho_s \frac{\partial \bar{q}_i}{\partial t} + \varepsilon_b \frac{\partial(u_o^j C_i)}{\partial z} = \varepsilon_b (E_{b,i}^j) \frac{\partial^2 C_i}{\partial z^2} \quad (AF2.1)$$

Where  $\rho_s$  is the solid phase density,  $u_o^j$  is the mobile phase velocity within zone “j”,  $\varepsilon_b$  is the bed void fraction,  $\varepsilon_p$  is the particle porosity,  $\bar{C}_{i,pore}$  is the average pore phase concentration. In Eq.

(AF2.1), the  $\frac{\partial \bar{q}_i}{\partial t}$  term is the linear lumped mass transfer parameter. In Example 1 it is:

$$\frac{\partial \bar{q}_i}{\partial t} = MTC_{s,i}(q_i^* - q_i) \quad (AF2.2)$$

Where  $MTC_{s,i}$  is the mass transfer coefficient based on the solid phase concentration and  $q_i^*$  is the equilibrium solute concentration in the stationary phase

In Example 2 it is:

$$\frac{\partial \bar{q}_i}{\partial t} = MTC_{l,i}(C_i - C_i^*) \quad (AF2.3)$$

Where  $MTC_{l,i}$  is the mass transfer coefficient based on the liquid phase concentration and  $C_i^*$  is the equilibrium mobile phase concentration. The axial dispersion coefficient was estimated using the Chung and Wen Correlations [1].

Simulations were performed using the Aspen Chromatography simulated moving bed template. The discretization method used in the simulations was a Quadratic Upwind Differencing Scheme (QDS) with 181 elements for example 1 and 150 elements for example 2.

The integration method used was the Implicit Euler Method with fixed step sizes. The step size for the first step of each run was set to  $5 \times 10^{-6}$  and then after the first step, the step size was reduced. A MA48 linear solver was used with a maximum iterative passes of 10. The absolute variable tolerance, relative variable tolerance, and the absolute equation tolerances were set to  $1 \times 10^{-7}$ . The Numerical derivative absolute perturbation, numerical derivative relative perturbation and explicit event tolerance were set to  $1 \times 10^{-5}$ . The Non Linear Solver mode was set to Standard with a Mixed Newton Method. A least squares estimator was used with the solution convergence tolerance of  $1 \times 10^{-6}$  and a maximum of 400 iterations. The FEASOPT (feasible path successive quadratic programming optimizer) was used with a maximum of 100 iterations and a solution convergence tolerance of 0.0001.
